# Supplementary material for: Fine particle pH and sensitivity to NH&lt;sub&gt;3&lt;/sub&gt; and HNO&lt;sub&gt;3&lt;/sub&gt; over summertime South Korea during KORUS-AQ
Source: Copernicus journal article supplement (doi:10.5194/acp-2020-501), 2020-07-21
Supplement: Supplementary file [file acp-2020-501-AC2-supplement.pdf]

### ***Response to Reviewer #5 comments:***

This paper presents the results of a thermodynamic equilibrium analysis to isolate the NH<sub>3</sub>-dominant vs. HNO<sub>3</sub> dominant regimes by analyzing the atmospheric chemical observations measured during the KORUS-AQ campaign. The authors related the results to the policy of mitigation strategies for high levels of PM concentrations over the Korea. Above all, this study seems to be important in terms of dividing emission reduction strategies into two regimes in terms of policy approaches. Overall, this manuscript seems to deserve publication in *acp*, suggesting that between two emission reductions (HNO<sub>3</sub> vs. NH<sub>3</sub>), HNO<sub>3</sub> (or NO<sub>x</sub>) reduction is better to be chosen as a priority in emission reduction, than NH<sub>3</sub> reduction. However, the current conclusion would become more solid by supplementing the following comments (below).

*Answer: We thank the reviewer for the positive view of our work! Below, we include the response to each comment and question raised.*

### **Key comments:**

1. Before submitting the current comment, I noticed the point of anonymous referee#2, pointing out the implications for policy making: transported nitrate via free troposphere (L48) vs. local concentrations within PBL(1km). I recommend the authors to take a note on the differences from identical tests for two separated synoptic periods (classified by Peterson et al. 2019): Stagnation under a persistent anticyclone (May 17–22) and transported haze development (May 25–31).

Peterson, D. A., Hyer, E. J., Han, S.-O., Crawford, J. H., Park, R. J., Holz, R., Kuehn, R. E., Eloranta, E., Knute, C., Jordan, C. E., Lefer, B. L., 2019. Meteorology influencing springtime air quality, pollution transport, and visibility in Korea. *Elem. Sci. Anth.* 7 (1), <https://doi.org/10.1525/elementa.395>.

*Answer: We thank the reviewer for pointing this out. As suggested, we will discuss the two cases mentioned in the analysis and policy implications of the revised manuscript.*

2. It needs to be stated that HNO<sub>3</sub> control does not have the same meaning as NO<sub>x</sub> control. (e.g., line 367). Even if NO<sub>x</sub> emissions are reduced, HNO<sub>3</sub> generation may not decrease much due to fluctuations in HNO<sub>3</sub> generation efficiency. This is related to the non-linearity of NO<sub>x</sub>-HNO<sub>3</sub> reaction from three dimensional atmospheric chemistry viewpoint, rather than from equilibrium perspectives.

Fu et al. (2020), <https://dx.doi.org/10.1021/acs.est.9b07248>, *Environ. Sci. Technol.*, 2020, 54, 3881-3889

*Answer: This is a good point, and we will clarify these points in the revised manuscript.*

3. It is worth mentioning that besides chemical equilibrium, there may be a role of ammonia, e.g. in the oxidation process of NO<sub>x</sub>: Li et al(2018), *PNAS* 115 (28) 7236 7241, [doi.org/10.1073/pnas.1807719115](https://doi.org/10.1073/pnas.1807719115), Zhang et al(2020), *PNAS* 117 (8) 3960 3966, [doi.org/10.1073/pnas.1919343117](https://doi.org/10.1073/pnas.1919343117)

*Answer: Thank you for raising this point, we will note this chemical feedback in the modified manuscript.*

4. Regarding the NO<sub>x</sub> control vs NH<sub>3</sub> control described in "Summary and broader implications", why not both "NO<sub>x</sub> and NH<sub>3</sub> controls"? Reductions in both NO<sub>x</sub> and NH<sub>3</sub> emissions at the same time seems to be a reasonable approach to reducing both nitrate and avoiding large increases in particle acidity. If there are any advantages of reducing both, please describe in the manuscript.

*Answer: Indeed, for a significant fraction of the data points, the aerosol is sensitive to both NO<sub>3</sub> and NH<sub>3</sub> levels – for which both NO<sub>3</sub> and NH<sub>3</sub> controls would be effective. The aerosol, however, is always sensitive to NO<sub>3</sub> reductions, especially for cases where aerosol levels were high. For this reason, we ranked the controls for NO<sub>3</sub> higher than reductions of NH<sub>3</sub> – but still mention both. We will clarify these points in the revised text.*

#### **Minor comments:**

5. line 52, 56, 655-656: RSSR, 2016 => RSSR, 2017

6. line 58: rephrase "air quality mitigation strategies", e.g., air pollution mitigation strategies

7. line 425: add the citation info for Wong et al. (2020) to the references section

8. line 701-710: cite Warner et al. (2017) and Womack et al. (2019) in the text

9. Figure 2: need to switch "Yes" and "No"

*Answer: Thank you for pointing out these issues! All corrections made.*

#### **References**

Nenes, A., Pandis, S. N., Kanakidou, M., Russell, A., Song, S., Vasilakos, P., and Weber, R. J.: Aerosol acidity and liquid water content regulate the dry deposition of inorganic reactive nitrogen, Atmos. Chem. Phys., in press, 2021.
